# Supplementary material for: Efficacy of cilostazol on platelet reactivity and cardiovascular outcomes in patients undergoing percutaneous coronary intervention: insights from a meta-analysis of randomised trials
Source: PubMed Central journal article supplement — Open Heart. 2014 Aug 7;1(1):e000068. doi: 10.1136/openhrt-2014-000068 (PMC4189225; doi:10.1136/openhrt-2014-000068), 2014-08-07

## Web Appendix

### FIGURE LEGENDS

**Figure A1.** Primary Platelet Reactivity Outcome: Difference in platelet reactivity units (PRU) after treatment between TAPT vs. DAPT stratified by baseline acute coronary syndrome (ACS) status

**Figure A2.** Primary Platelet Reactivity Outcome: Difference in platelet reactivity units (PRU) after treatment between TAPT vs. DAPT stratified by baseline clopidogrel resistance status

**Figure A3.** Secondary Platelet Reactivity Outcome: Difference in percent platelet inhibition after treatment between TAPT vs. DAPT stratified by baseline acute coronary syndrome (ACS) status

**Figure A4.** Secondary Platelet Reactivity Outcome: Difference in percent platelet inhibition after treatment between TAPT vs. DAPT stratified by baseline clopidogrel resistance status

**Figure A5.** Secondary Platelet Reactivity Outcome: Risk of High On-treatment Platelet Reactivity (HTPR) after treatment between TAPT vs. DAPT stratified by baseline acute coronary syndrome (ACS) status

**Figure A6.** Secondary Platelet Reactivity Outcome: Risk of High On-treatment Platelet Reactivity (HTPR) after treatment between TAPT vs. DAPT stratified by baseline clopidogrel resistance status

**Figure A1. Primary Platelet Reactivity Outcome: Difference in platelet reactivity units (PRU) after treatment between TAPT vs. DAPT stratified by baseline acute coronary syndrome (ACS) status**

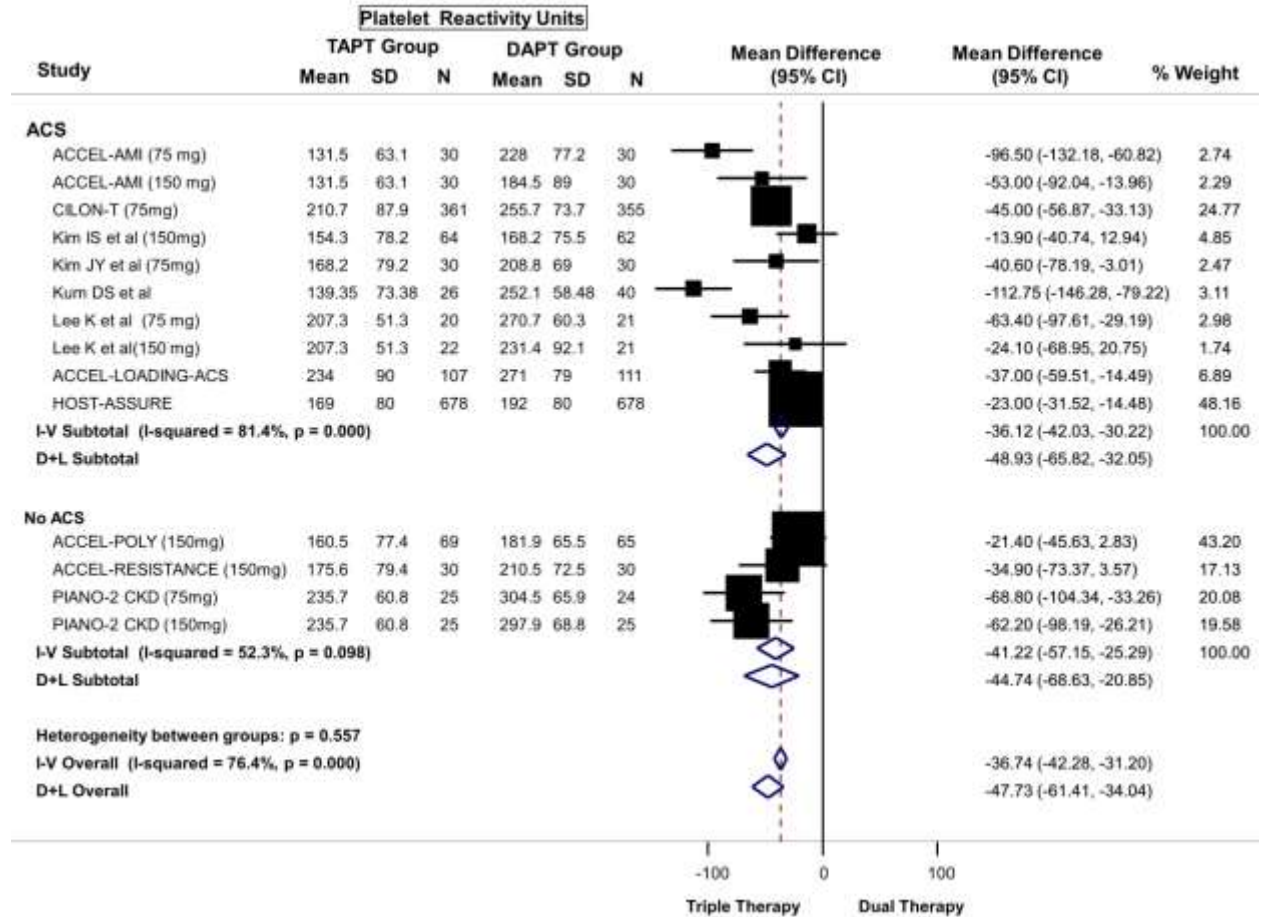

**Figure A2. Primary Platelet Reactivity Outcome: Difference in platelet reactivity units (PRU) after treatment between TAPT vs. DAPT stratified by baseline clopidogrel resistance status**

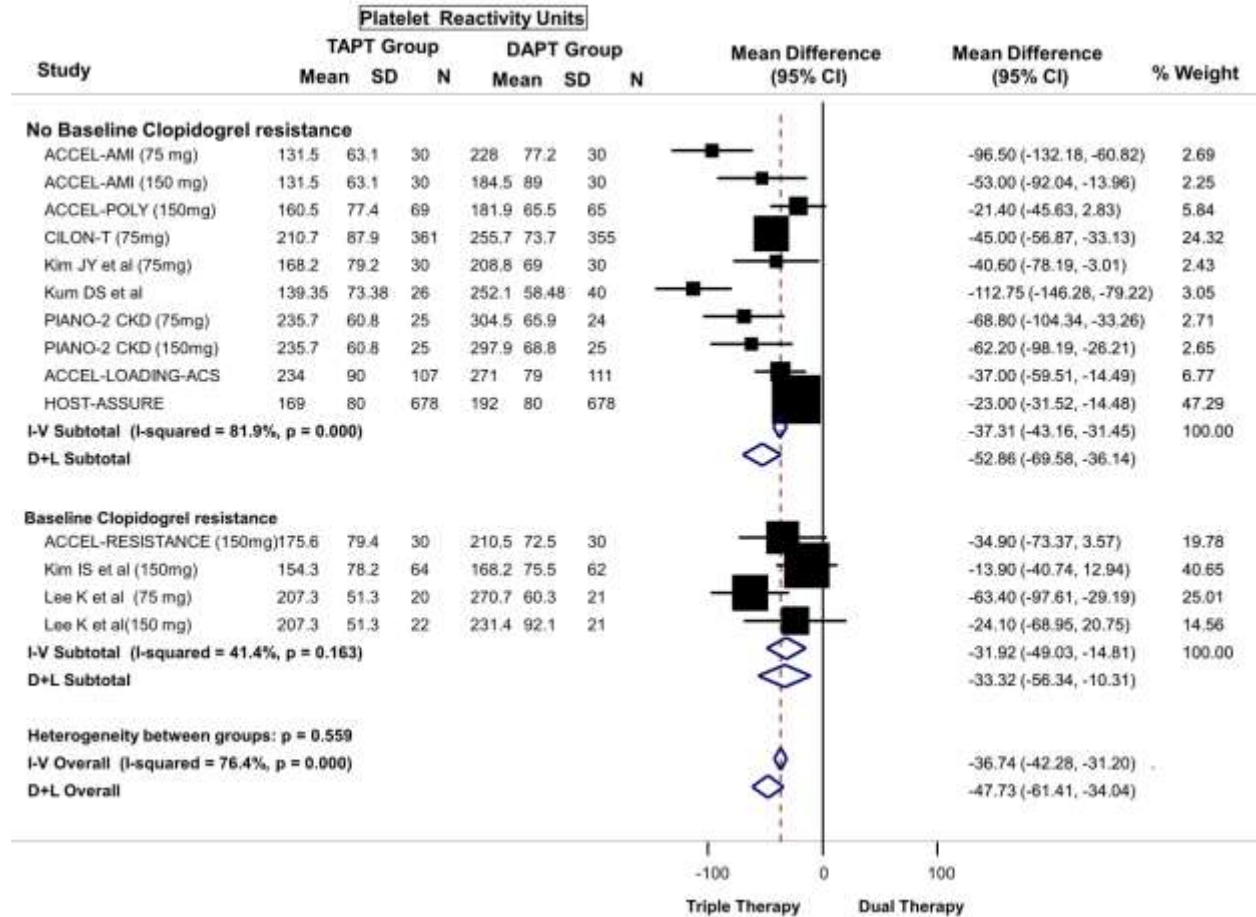

**Figure A3. Secondary Platelet Reactivity Outcome: Difference in percent platelet inhibition after treatment between TAPT vs. DAPT stratified by baseline acute coronary syndrome (ACS) status**

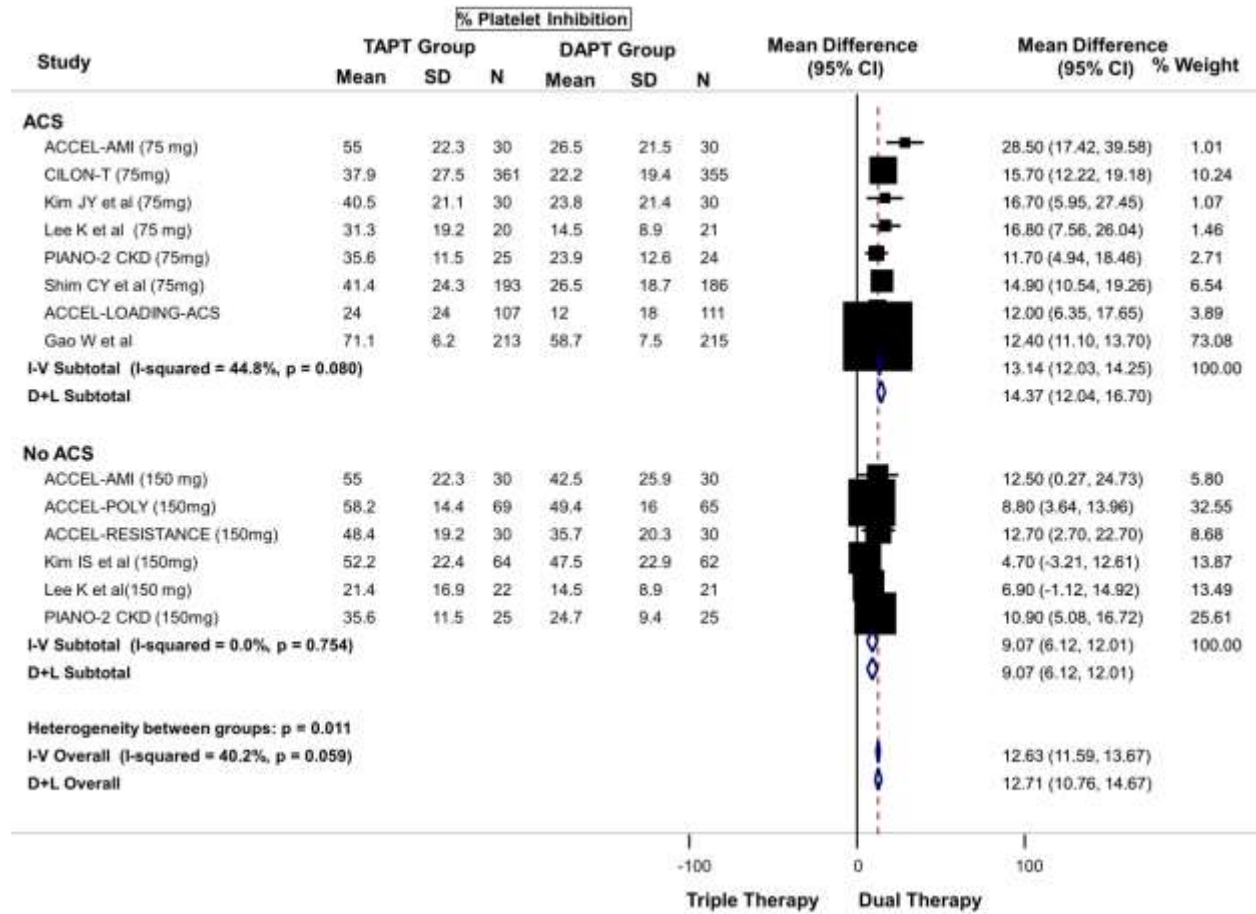

**Figure A4. Secondary Platelet Reactivity Outcome: Difference in percent platelet inhibition after treatment between TAPT vs. DAPT stratified by baseline clopidogrel resistance status**

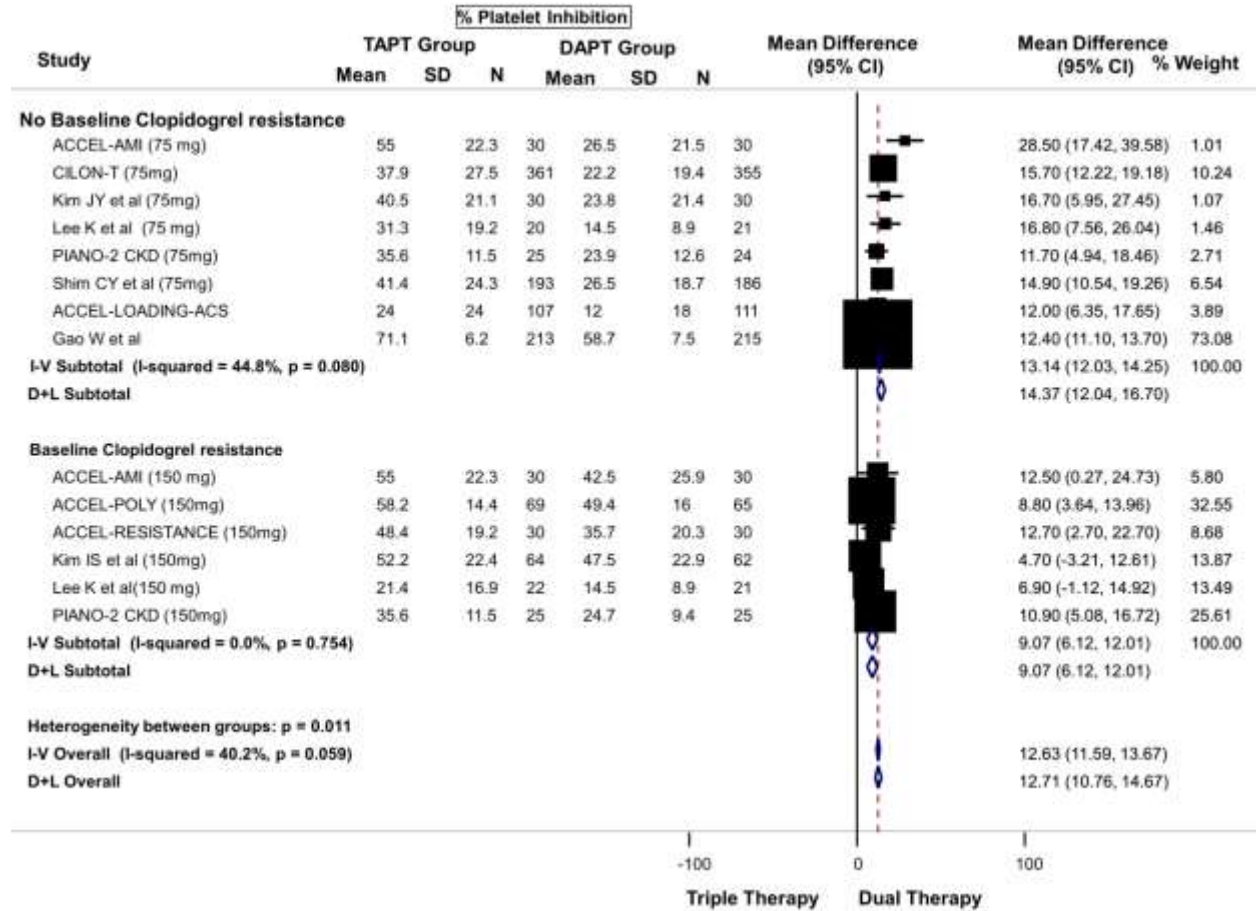

**Figure A5. Secondary Platelet Reactivity Outcome: Risk of High On-treatment Platelet Reactivity (HTPR) after treatment between TAPT vs. DAPT stratified by baseline acute coronary syndrome (ACS) status**

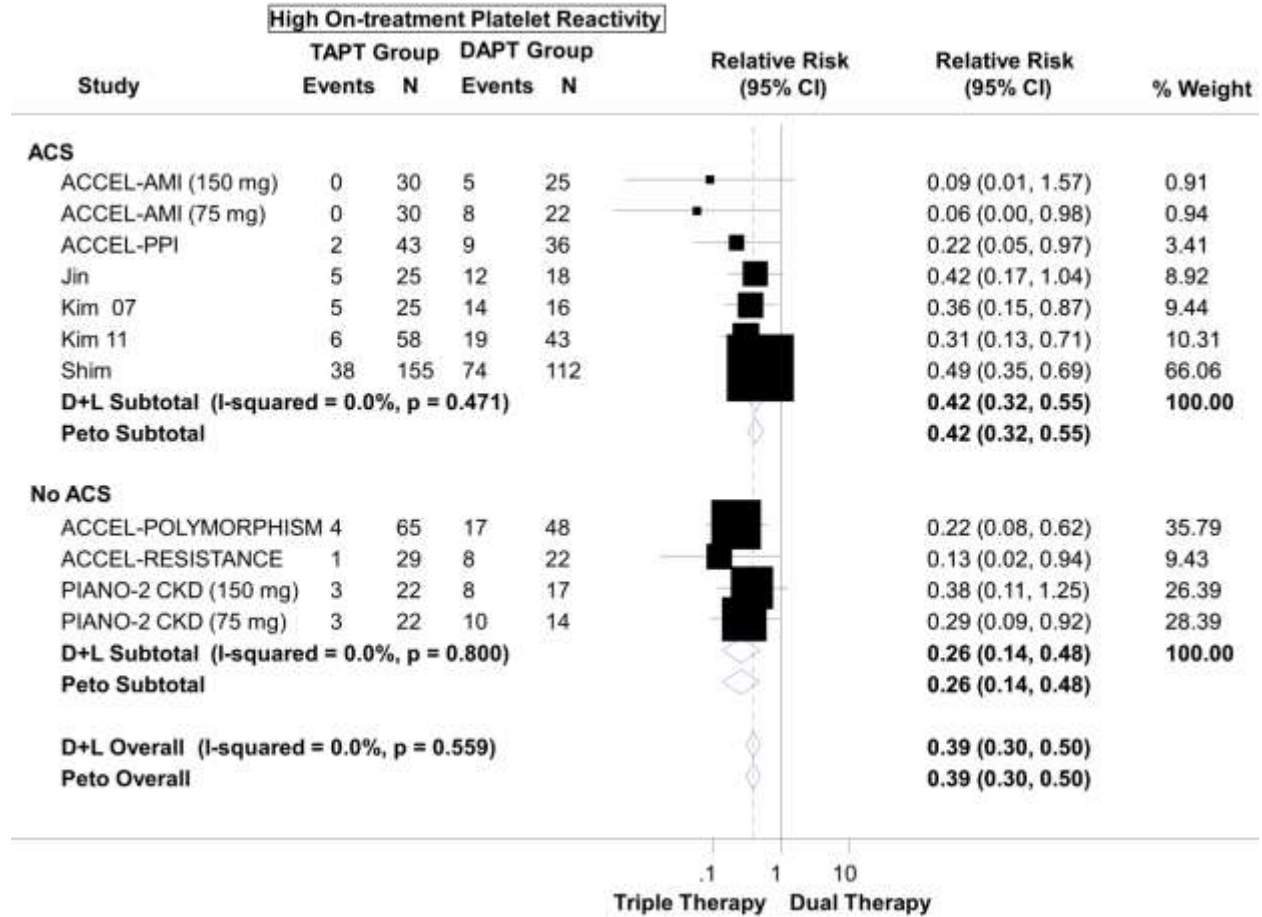

**Figure A6. Secondary Platelet Reactivity Outcome: Risk of High On-treatment Platelet Reactivity (HTPR) after treatment between TAPT vs. DAPT stratified by baseline clopidogrel resistance status**

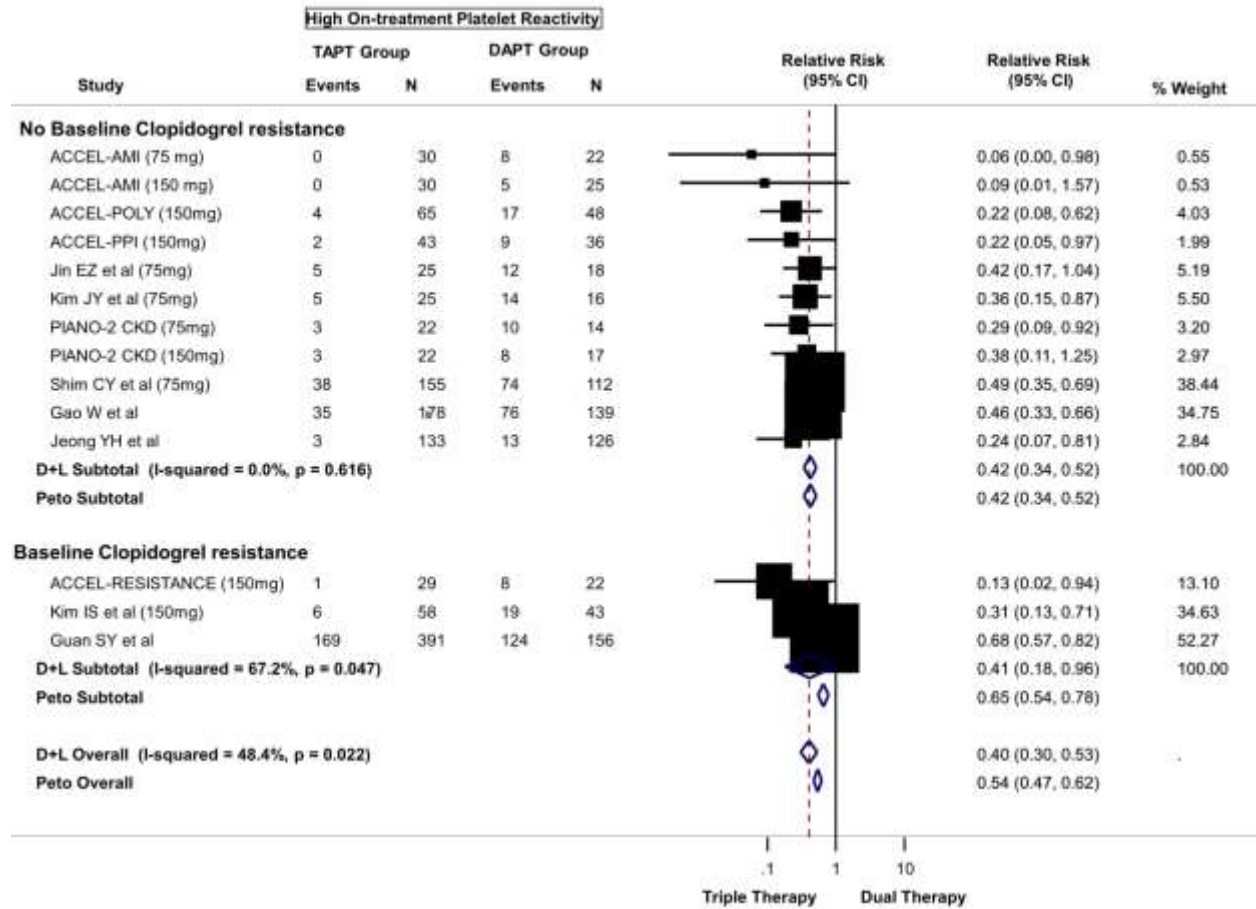

Supplement: openhrt-2014-000068-s1.pdf [file openhrt-2014-000068-s1.pdf]
